# Supplementary material
Source: PubMed Central journal article supplement (PMC2907422)
Supplement: NIHMS207691-supplement-Supp_Fig_s1-s3.pdf [file NIHMS207691-supplement-Supp_Fig_s1-s3.pdf]

1 **Supplementary material including legends of supplementary figures**  
2 **and movies, and plasmid and strain constructions**

3

4 **Legends of supplementary figures**

5 Fig. S1: Time-lapse microscopy sequence of FtsZ-YFP localization in the  $\Delta dipM$   
6 mutant. Cells of strain CJW3430 were grown in the presence of 250  $\mu$ M of vanillic acid  
7 for 3 h to induce the expression of *ftsZ-yfp* prior to imaging. The arrows and white lines  
8 indicate the stalled FtsZ rings and unstable accumulation of FtsZ, respectively. The  
9 arrowhead shows a condensed FtsZ ring following unstable FtsZ accumulation.

10

11 Fig S2: Western blot analysis of various mCherry fusions using anti-RFP antibody.  
12 Protein extracts were generated from cultures grown under the conditions described in  
13 the main text. (A) Lane 1, CJW3116 carrying mCherry-dipM $_{\Delta 1-30}$ ; lane 2, CJW3117  
14 carrying mCherry-DipM $_{\Delta 1-236}$ ; lane 3, CJW3121 carrying DipM $_{\Delta 297-609}$ -mCherry; lane 4,  
15 CJW3124 carrying DipM-mCherry; lane 5, CJW3439 carrying DipM $_{\Delta 501-609}$ -mCherry;  
16 lane 6, CJW3526 carrying DipM $_{1-296\Delta 121-167}$ -mCherry; lane 7, CJW3528 carrying  
17 DipM $_{1-296\Delta 175-223}$ -mCherry. Cultures were grown in the presence of 250  $\mu$ M of vanillic  
18 acid. Samples were taken when the cultures reached an OD $_{660} \approx 0.3$ . (B) Lanes 1-3,  
19 CJW3446 carrying DipM $_{\Delta 501-609}$ -mCherry grown in the presence of 0.3% xylose and  
20 250  $\mu$ M vanillic acid (lane 1), only 250  $\mu$ M vanillic acid (lane 2), or only 0.3 % xylose  
21 (lane 3); lane 4, CJW3121 carrying DipM $_{\Delta 297-609}$ -mCherry; lane 5, CJW3530 carrying  
22 DipM $_{\Delta 297-609}$ -mCherry; lane 6, CJW3117 carrying DipM $_{\Delta 297-609}$ -mCherry; lane 7,  
23 CJW2959 carrying periplasmic mCherry. Induction conditions were the same as in (A).

24 (C) Lane 1, CJW3440 carrying DipM-mCherry; lane 2, CJW3444 carrying DipM $_{\Delta 54-419}$ -  
25 mCherry. (D) Schematics of the different mCherry fusions examined.

26

27 Fig. S3. Localization of periplasmic mCherry and DipM $_{\Delta 501-609}$ -mCherry in different  
28 genetic backgrounds. *Top left panel*, fluorescent micrographs of DipM $_{\Delta 501-609}$ -mCherry  
29 (left) in DipM-depleted cells (CJW3446); depletion of DipM was achieved by  
30 subculturing CJW3446 without vanillic acid and with 0.3% xylose for 24 h. The culture  
31 was at an OD $_{660}$  of 0.2 prior to imaging. *Top right panel*, fluorescent micrograph of  
32 periplasmic mCherry in  $\Delta dipM$  mutant cells (strain CJW3551). Cells were grown in the  
33 presence of 250  $\mu$ M vanillic acid until the culture reached an OD $_{660}$  of  $\sim$  0.2. Arrows  
34 show shed vesicles containing mCherry signal. *Bottom left panel*, fluorescent  
35 micrograph of DipM $_{\Delta 501-609}$ -mCherry in FtsZ-depleted cells (CJW3446) grown without  
36 xylose and with 250 mM vanillic acid for 5 h. *Bottom right panel*, fluorescent  
37 micrograph of periplasmic mCherry in FtsZ-depleted cells (CJW3550) grown without  
38 xylose and with 250 mM vanillic acid for 5 h. The bars represent 1  $\mu$ m.

39

#### 40 **Movie legends**

41 Movie S1. A  $\Delta dipM$  mutation is associated with vesicle shedding.  $\Delta dipM$  cells (strain  
42 CJW3137) growing in M2G liquid medium were spotted on an agarose-padded  
43 microscope slide containing M2G medium and were imaged at room temperature by  
44 time-lapse DIC microscopy. The arrow indicates a division site that recedes. Time is in  
45 h:min.

46

47 Movie S2. A  $\Delta dipM$  mutation is associated with cell pole enlargement over time.  $\Delta dipM$   
48 cells (strain CJW3137) growing in M2G liquid medium were spotted on an agarose-

49 padded microscope slide containing M2G medium and were imaged at room  
50 temperature by time-lapse DIC microscopy. The arrowhead shows an example of a cell  
51 pole enlarging as it ages. Time is in h:min.

52

53 Movie S3. A  $\Delta dipM$  mutation is occasionally associated with cell branching from the  
54 poles.  $\Delta dipM$  cells (strain CJW3137) growing in M2G liquid medium were spotted on  
55 an agarose-padded microscope slide containing M2G medium and were imaged at room  
56 temperature by time-lapse phase-contrast microscopy. Time is in min.

57

58 Movie S4. A  $\Delta dipM$  mutation affects FtsZ dynamics.  $\Delta dipM$  cells (strain CJW3430)  
59 were grown in the presence of 250 $\mu$ M vanillic acid for 3 h to induce the synthesis of  
60 FtsZ-YFP (in red) prior to time-lapse microscopy at room temperature on agarose-  
61 padded slides containing M2G medium (but no vanillic acid). Arrows follow the  
62 position of an unstable FtsZ ring shown here as an example. Time is in h:min:sec.

63

64 Movie S5. Division can occur a relatively long time after the FtsZ ring has disappeared  
65 in  $\Delta dipM$  cells.  $\Delta dipM$  cells (strain CJW3430) were grown in the presence of 250 $\mu$ M  
66 vanillic acid for 3 h to induce the synthesis of FtsZ-YFP (in red) prior to time-lapse  
67 microscopy at room temperature on agarose-padded slides containing M2G medium  
68 (but no vanillic acid). The arrowheads show sites where cell division occurs well after  
69 the FtsZ ring has finished constricting and has disassembled. Time is in h:min:sec.

70

71 Movie S6. DipM-mCherry changes its localization during the cell cycle. A  
72 synchronized population of cells producing DipM-mCherry (in red) from the native  
73 chromosomal *dipM* locus (strain CJW3124) were spotted on an agarose-padded slide

74 containing M2G medium where they resumed growth at room temperature. The time-  
75 lapse microscopy sequence of phase contrast and fluorescent images is shown as an  
76 overlay. The arrowhead in the first time point indicates the old pole where a stalk forms  
77 at later time points. Time is in min.

78

## 79 **Plasmid construction**

80 **pNPTS $\Delta$ dipM:: $\Omega$** : The flanking regions of *dipM* were amplified using CB15N  
81 chromosomal DNA as template and the primer pairs  
82 CAACTAGTCCATGCCCAAGCCGCAGCTTC with  
83 CAAAGCTTTGGTGCTGCCGCGCTGATCAG and  
84 CAGAATTCATGAGCGGAGGGACGACGAAG with  
85 CAAAGCTTGCGTCCACAACCTGCCTCATAG. The PCR fragments were digested  
86 with HindIII and SpeI and with EcoRI and HindIII, respectively. The two PCRs were  
87 triple ligated into pNPTS134 digested with EcoRI and SpeI. The resulting plasmid was  
88 purified, digested with HindIII and used as recipient of the  $\Omega$ -Spc (Alexeyev *et al.*,  
89 1995).

90

91 **pXMCS2ftsA**: A PCR fragment of the 3'-end of the *ftsA* gene was obtained with  
92 primers CACATATGTCGCGAATGGAGGATCGGAAACAG and  
93 CAGCTAGCCGAACATGGCGCGGGGATCAC and using CB15N chromosomal  
94 DNA as template. The PCR product was digested with NheI and NdeI and cloned into  
95 pXMCS2 digested with the same restriction enzymes.

96

97 **pdipMCHY**: A PCR of the 5'-end of *dipM* was obtained with primers  
98 CAGAATTCAGCGCCGCCGCGCAGCGTTCGACG and

99 CAACCGGTGGCGGGGCAGCACCAGCGCCGGATC, digested with EcoRI and  
100 AgeI, and cloned into pCHYC-4.  
101

102 **pVdipM<sub>Δ501-609</sub>CHY**: The PCR product obtained with primers  
103 CACATATGATGAGGCAGTTGTGGACGCAAG and  
104 CAGAATTCTCGCCCGTGCCCTTCACGCCAAAG was digested with EcoRI and  
105 NdeI, and cloned into pVCHYC-4.  
106

107 **pVdipM<sub>Δ297-609</sub>CHY**: The PCR product obtained with primers  
108 CACATATGATGAGGCAGTTGTGGACGCAAG and  
109 CAGAATTCTCGACCTGACGCGGCCCGCCAC was digested with EcoRI and  
110 NdeI, and cloned into pVCHYC-4.  
111

112 **pVspCHYdipM<sub>Δ1-30</sub>**: The PCR product obtained with primers  
113 CAGAATTCCATCCTGATCAGCGCGGCAGC and  
114 CAGGTACCCGCTTCACGCCGA ACTTCCCG was digested with EcoRI and KpnI,  
115 and cloned into plasmid pVsigpepCHYNMCS-4.  
116

117 **pVspCHYdipM<sub>Δ1-236</sub>**: The PCR product obtained with primers  
118 CAGAATTCCATCCTGATCAGCGCGGCAGC and  
119 CAGGTACCACGATGGTCGCCGAGGCCGAG was digested with EcoRI and KpnI,  
120 and cloned into plasmid pVsigpepCHYNMCS-4.  
121 **pTOPOdipM**: The PCR product obtained with primers  
122 GCGGATCCAGGAGGAATTAACCATGGGGCAGTTGTGGACGCAAGCGGCGGT

123 G and GGAGCGGGGCAGCACCAGCGCCGGATC was cloned in plasmid pCR2.1-  
124 TOPO following the manufacturer instructions.

125

126 **pRVdipMCHY**: Plasmid pTOPOdipM was used as a template to obtain a PCR with  
127 primers CAGAATTCTCGCGGGGCAGCACCAGCGCCGGATC and  
128 CACATATGATGAGGCAGTTGTGGACGCAAG that was digested with NdeI and  
129 EcoRI, and then was cloned into pRVCHYCMCS-5.

130

131 **pRVdipM<sub>Δ54-419</sub>CHY**: Plasmid pTOPOdipM was used as template for an inverse PCR  
132 reaction (Ochman *et al.*, 1988) with primers  
133 AGGTACCCTGGGCCTGGATCGTCTCACC and  
134 CAGGTACCGCCAACACCTATGCCCCGCGTG. The PCR product was digested with  
135 KpnI and re-ligated. The resulting plasmid was used as a template in a PCR reaction  
136 with primers CAGAATTCTCGCGGGGCAGCACCAGCGCCGGATC and  
137 CACATATGATGAGGCAGTTGTGGACGCAAG. The PCR product was digested  
138 with NdeI and EcoRI and cloned into pRVCHYCMCS-5.

139

140 **pVLysM1ACHY**: Plasmid pVdipM<sub>Δ296-609</sub>CHY was used as template in an inverse  
141 PCR reaction with primers CAGGTACCACGACCGCCAAGGCCTATGTC and  
142 CAGGTACCGGGCTTGCCCCGCGACTTCGAC. The product was digested with KpnI,  
143 ligated and electroporated. The sequence of the resultant plasmid was verified.

144

145 **pVLysM1BCHY**: Plasmid pVdipM<sub>Δ296-609</sub>CHY was used as template in an inverse  
146 PCR reaction with primers CAGGTACCGACATAGGCCTTGCGGTCGTC and

147 CAGGTACCCCGATCAAGACCACCCAGGTG. The product was digested with KpnI,  
148 ligated and electroporated. The sequence of the resultant plasmid was verified.

149

### 150 **Strain construction**

151 **CJW2959:** Plasmid pVspCHYNMCS-4 was electroporated into CB15N and insertion  
152 into the chromosome was selected by plating cells on PYE plates containing gentamycin  
153 (Gm).

154

155 **CJW3116:** Plasmid pVspCHYdipM was electroporated into CB15N and insertion into  
156 the chromosome was selected by plating cells on PYE plates containing Gm.

157

158 **CJW3117:** Plasmid pVspCHYdipM $\Delta_{1-236}$  was electroporated into CB15N and insertion  
159 into the chromosome was selected by plating cells on PYE plates containing Gm.

160

161 **CJW3118:** Plasmid pVspCHYdipM $\Delta_{1-412}$  was electroporated into CB15N.

162

163 **CJW3121:** Plasmid pVdipM $\Delta_{297-609}$ CHY was electroporated into CB15N and insertion  
164 into the chromosome was selected by plating cells in PYE plates containing Gm.

165 Insertion at the *vanA* locus was identified by a wild type phenotype of the colonies

166 when grown in M2G liquid medium in the absence of 250mM vanillic acid. The site of

167 insertion was verified by PCR.

168

169 **CJW3122:** Plasmid pVdipM $\Delta_{501-609}$ CHY was electroporated into CB15N and insertion  
170 into the chromosome was selected by plating cells on PYE plates containing Gm.

171 Insertion at the *dipM* locus was identified through by a  $\Delta dipM$  phenotype of the colonies

172 when grown in M2G liquid medium in the absence of 250mM vanillic acid. The site of  
173 insertion was verified by PCR.

174

175 **CJW3124:** Plasmid pdipMCHY was electroporated into CB15N.

176

177 **CJW3137:** Plasmid pNPTS $\Delta$ dipM:: $\Omega$  was electroporated into CB15N. Colonies in  
178 which the plasmid integrated into the chromosome were selected by plating cells on  
179 PYE plates containing spectomycin (Spc) and kanamycin (Kan). Second crossover  
180 events were selected through negative selection of the *sacB* gene (RiedandCollmer,  
181 1987) by plating cells on PYE plates containing 3% sucrose and Spc. Deletion of *dipM*  
182 was verified by PCR.

183

184 **CJW3187:** Plasmid pXMCS2ftsA was electroporated into CB15N cells and the  
185 transformants were grown in PYE plates containing 0.3% xylose and kanamycin.

186

187 **CJW3430:** Plasmid pNPTS $\Delta$ dipM:: $\Omega$  was electroporated into MT196. Colonies in  
188 which the plasmid integrated into the chromosome were selected by plating cells on  
189 PYE plates containing spectomycin (Spc) and kanamycin (Kan). Second crossover  
190 events were selected through negative selection of the *sacB* gene (RiedandCollmer,  
191 1987) by plating cells on PYE plates containing 3% sucrose and Spc. Deletion of *dipM*  
192 was verified by PCR.

193

194 **CJW3436:** Plasmid pdipMCHY was electroporated into MT196.

195



196 **CJW3437:** The *dipM::pdipMCHY* allele was transduced into strain CJW1715 with a  
197  $\Phi$ CR30 phage lysate obtained from strain CJW3124. Transductants were on PYE plates  
198 containing Gm.

199

200 **CJW3438:** The *dipM::pdipMCHY* allele was transduced into strain YB1585 with a  
201  $\Phi$ CR30 phage lysate obtained from strain CJW3124. Transductants were selected on  
202 PYE plates containing Gm.

203

204 **CJW3439:** Plasmid pVdipM $\Delta_{501-609}$ CHY was electroporated into CB15N, insertion into  
205 the chromosome was selected by plating cells on PYE plates containing Gm. Insertion at  
206 the *vanA* locus was identified by a wild type phenotype of the colonies when grown in  
207 M2G liquid medium in the absence of 250mM vanillic acid. The site of insertion was  
208 verified by PCR.

209

210 **CJW3440:** Plasmid pRVdipMCHY was electroporated into CJW3137 and  
211 transformants were selected by repetitive subculture in liquid M2G media containing  
212 oxytetracyclin (OTc).

213

214 **CJW3444:** Plasmid pRVdipM $\Delta_{50-412}$ CHY was electroporated into CJW3137 and  
215 transformants were selected by repetitive subculture in liquid M2G media containing  
216 OTc.

217

218 **CJW3445:** Plasmid pVdipM $\Delta_{296-609}$ CHY was electroporated into CB15N. Integrants  
219 were selected on PYE plates containing Gm. Insertion at the *dipM* locus was identified

220 by a  $\Delta dipM$  phenotype of the colonies when grown in M2G liquid medium in the  
221 absence of 250mM vanillic acid. The site of insertion was verified by PCR.

222

223 **CJW3446:** The *ftsZ::pBJM* allele was transduced into strain CJW3122 with a  $\Phi$ CR30  
224 phage lysate obtained from strain YB1585. Transductants were selected on PYE plates  
225 containing Kan and 0.3% xylose.

226

227 **CJW3447:** The *ftsA::pXMCS2ftsA* allele was transduced into strain MT196 with a  
228  $\Phi$ CR30 phage lysate obtained from strain CJW3187. Transductants were selected on  
229 PYE plates containing Kan and 0.3% xylose. The resultant strain was transformed with  
230 plasmid pCHYC*dipM* and integrants were selected by on PYE plates containing Gm.

231

232 **CJW3448:** Strain CJW3455 was transformed with plasmid pNPTS $\Delta dipM::\Omega$ .  
233 Integrants were selected on PYE plates containing Spc and Kan. Second crossover  
234 events were selected on PYE plates containing 3% sucrose and Spc. Deletion of *dipM*  
235 was verified by PCR.

236

237 **CJW3449:** Plasmid pXGFPMCS2 (Thanbichler *et al.*, 2007) was electroporated into  
238 CJW3137.

239

240 **CJW3526:** Plasmid pVLysM1ACHY was electroporated into CB15N. Integration of  
241 the plasmid was selected by plating in Gm-containing PYE plates. The site of insertion  
242 was verified by PCR.

243 **CJW3528:** Plasmid pVLysM1BCHY was electroporated into CB15N. Integration of  
244 the plasmid was selected by plating in Gm containing PYE plates. The site of insertion  
245 was verified by PCR.

246

247 **CJW3530:** The *ftsZ*:pBJM allele was transduced into strain CJW3121 with a  $\Phi$ CR30  
248 phage lysate obtained from strain YB1585. Transductants were selected on PYE plates  
249 containing Kan and 0.3% xylose.

250

251 **CJW3550:** Single *vanA*::pVsigpepCHYN-4 allele from strain CJW2959 was transduced  
252 into YB1585.

253

254 **CJW3551:** The *vanA*::pVsigpepCHYN-4 allele from strain CJW2959 was transduced  
255 into CB15N/pNPTS $\Delta$ dipM:: $\Omega$  using a  $\Phi$ CR30 phage lysate obtained from strain  
256 CJW2959. Transductants were selected on PYE plates containing Gm. Second  
257 crossover events were selected through negative selection of the *sacB* gene by plating  
258 cells on PYE plates containing 3% sucrose and Spc. Deletion of *dipM* was verified by  
259 PCR.

260

261 **CJW3591:** Plasmid pdipMCHY was electroporated into PC8848 and insertion into the  
262 chromosome was selected on PYE plate containing Gm.

263

## 264 **References**

265 Alexeyev, M.F., Shokolenko, I.N. and Croughan, T.P., (1995) Improved antibiotic-  
266 resistance gene cassettes and omega elements for *Escherichia coli* vector  
267 construction and in vitro deletion/insertion mutagenesis. *Gene* **160**: 63-67.

- 268 Ochman, H., Gerber, A.S. and Hartl, D.L., (1988) Genetic applications of an inverse  
269 polymerase chain reaction. *Genetics* **120**: 621-623.
- 270 Ried, J.L. and Collmer, A., (1987) An *nptI-sacB-sacR* cartridge for constructing  
271 directed, unmarked mutations in gram-negative bacteria by marker exchange-  
272 eviction mutagenesis. *Gene* **57**: 239-246.
- 273 Thanbichler, M., Iniesta, A.A. and Shapiro, L., (2007) A comprehensive set of plasmids  
274 for vanillate- and xylose-inducible gene expression in *Caulobacter crescentus*.  
275 *Nucleic Acids Res* **35**: e137.
- 276
- 277

## FtsZ-YFP/Phase Overlay

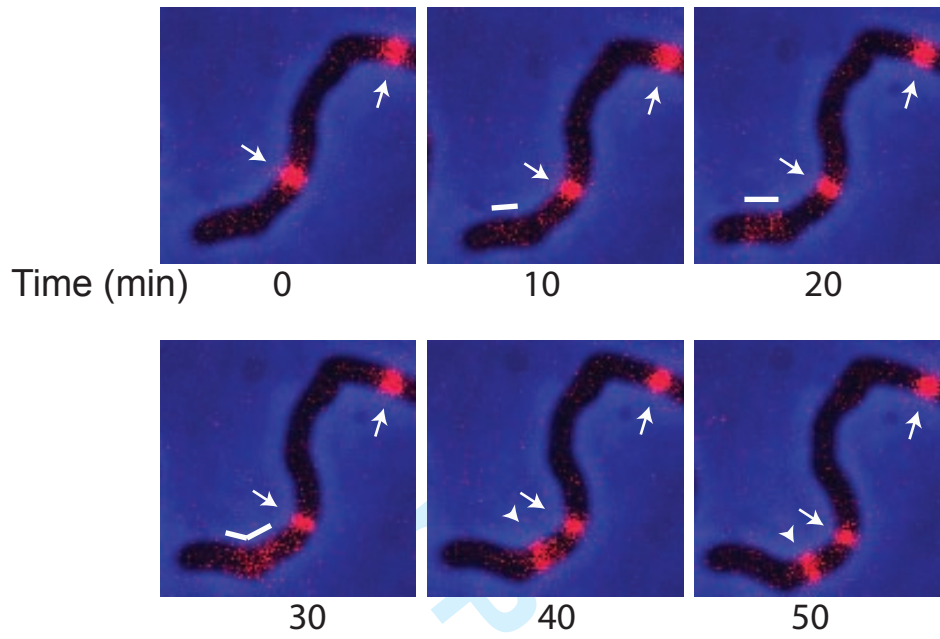

Fig. S1

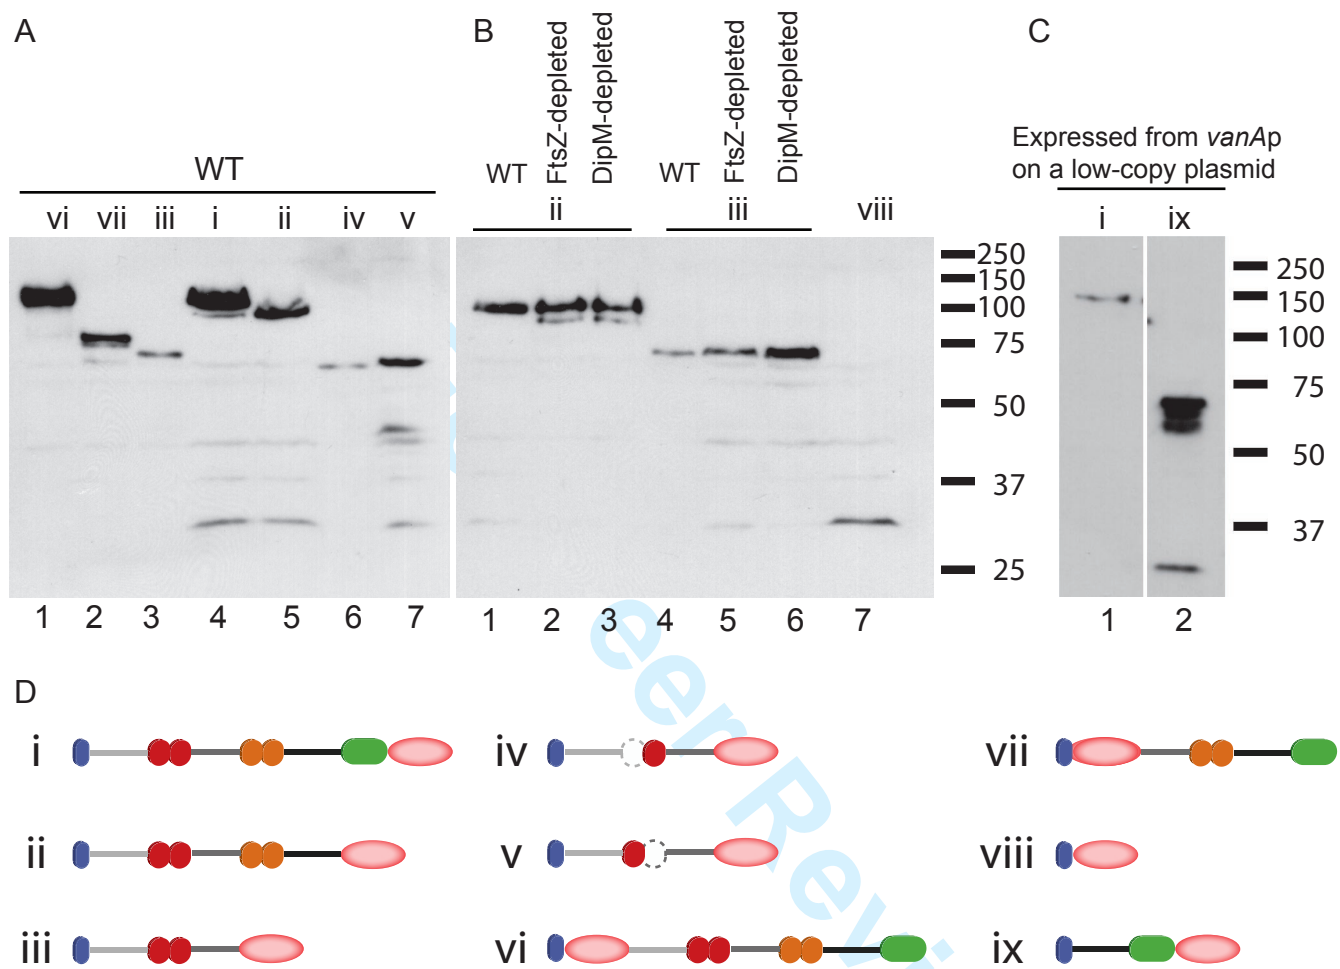

Fig. S2

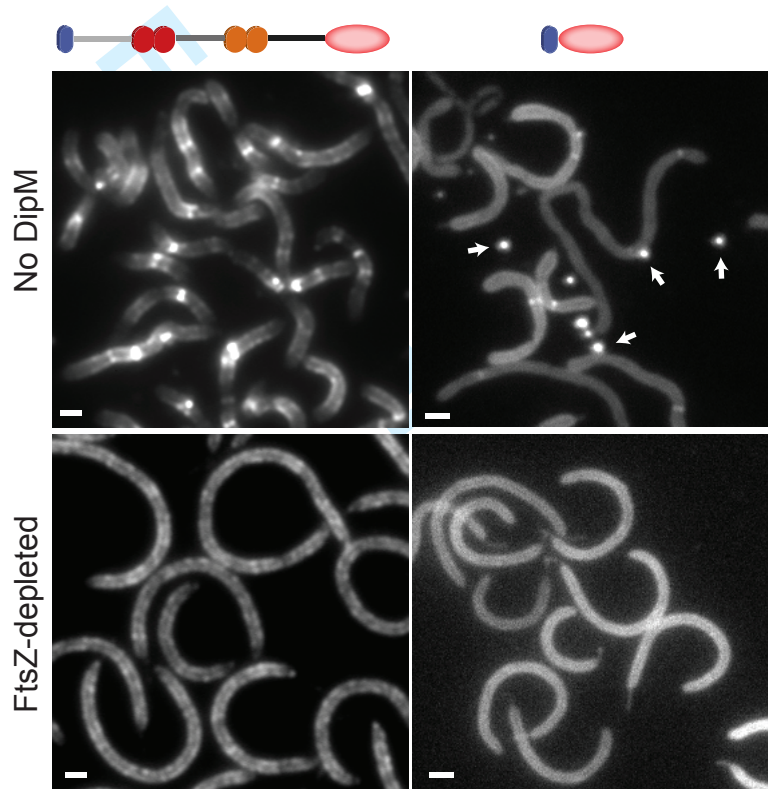

Fig. S3
